# Supplementary material
Source: Research Square preprint supplement (doi:10.21203/rs.3.rs-9694624/v1)
Supplement: Supplementary file 1 [file 2d2ea6ceb54a64c6c971da3a.docx]

**Supplementary Materials**

**Supplementary Table S1. Summary comparison of discontinuous-fiber composite manufacturing methods.**

| **Method** | **Strength (MPa)** | **Length (mm)** | **Alignment class** | **End/topology class** | **Processability avg. (/5)** | **Rationale** |
| --- | --- | --- | --- | --- | --- | --- |
| Gantry-based method | 550 | 50 | Highly aligned | Uniform end planes | 4.97 | Direct-to-part deposition using compact, low-cost, simple alignment hardware. |
| GMT | 38 | 25 | Short random whiskers | Distributed/staggered ends | 4.40 | Prepreg-like route with high processability but low alignment control. |
| Vacuum drum (1980) | 1200 | NR | Highly aligned | Distributed/staggered ends | 4.28 | Simple alignment route but requires vacuum collection and compression molding. |
| Glycerine | 290 | NR | Unaligned short fibres | Distributed/staggered ends | 3.05 | Indirect processing with relatively complex tooling. |
| Centrifuge | 1211 | 3 | Highly aligned | Distributed/staggered ends | 2.92 | Large tooling and indirect feedstock preparation. |
| DCFP | 293 | 100 | Unaligned short fibres | Distributed/staggered ends | 2.90 | Indirect processing with moderate scores across criteria. |
| Laser drilled | 1500 | NR | Highly aligned | Patterned discontinuity | 2.70 | Requires prepreg and laser patterning. |
| Disco | 1100 | 3 | Unaligned short fibres | Distributed/staggered ends | 2.55 | Moderate processability but limited by directness and cost. |
| Acoustic | 110 | 4.5 | Unaligned short fibres | Distributed/staggered ends | 2.42 | Acoustic alignment adds complexity and uses short fibers. |
| Ultrasonic | 45 | 0.05 | Short random whiskers | Distributed/staggered ends | 2.23 | Complex alignment route and very short reinforcement length. |
| DiscoTex | 535 | 32 | Unaligned short fibres | Patterned discontinuity | 1.77 | Limited published process detail; appears manually intensive. |
| HiPerDiF | 1509 | 3 | Highly aligned | Distributed/staggered ends | 1.15 | High alignment quality but complex and indirect feedstock preparation. |

Scoring definitions: Directness, alignment simplicity, reproducibility, and cost were rated on a 0-5 scale, where higher values indicate more favorable processability. The processability average is the mean of the four criteria. NR indicates that the fiber/tow length was not reported in the dataset.

**Supplementary Table S2. Processability scoring values used to calculate the average score.**

| **Method** | **Directness** | **Alignment simplicity** | **Reproducibility** | **Cost score** | **Processability avg. (/5)** |
| --- | --- | --- | --- | --- | --- |
| Gantry-based method | 5.0 | 5.0 | 5.0 | 4.9 | 4.97 |
| GMT | 3.0 | 4.0 | 4.0 | 4.9 | 4.40 |
| Vacuum drum (1980) | 3.6 | 4.4 | 4.0 | 4.0 | 4.28 |
| Glycerine | 3.2 | 2.9 | 2.8 | 3.3 | 3.05 |
| Centrifuge | 3.4 | 2.1 | 3.2 | 3.0 | 2.92 |
| DCFP | 3.2 | 2.7 | 2.9 | 2.8 | 2.90 |
| Laser drilled | 2.1 | 4.0 | 3.1 | 1.6 | 2.70 |
| Disco | 3.2 | 2.1 | 2.0 | 2.9 | 2.55 |
| Acoustic | 3.0 | 2.0 | 2.6 | 2.1 | 2.42 |
| Ultrasonic | 2.8 | 1.6 | 2.5 | 2.0 | 2.23 |
| DiscoTex | 1.5 | 3.0 | 1.1 | 1.5 | 1.77 |
| HiPerDiF | 1.1 | 1.4 | 0.8 | 1.3 | 1.15 |

Note: The cost score is defined so that higher scores correspond to lower cost, lower equipment burden, or lower practical barrier to adoption.

| 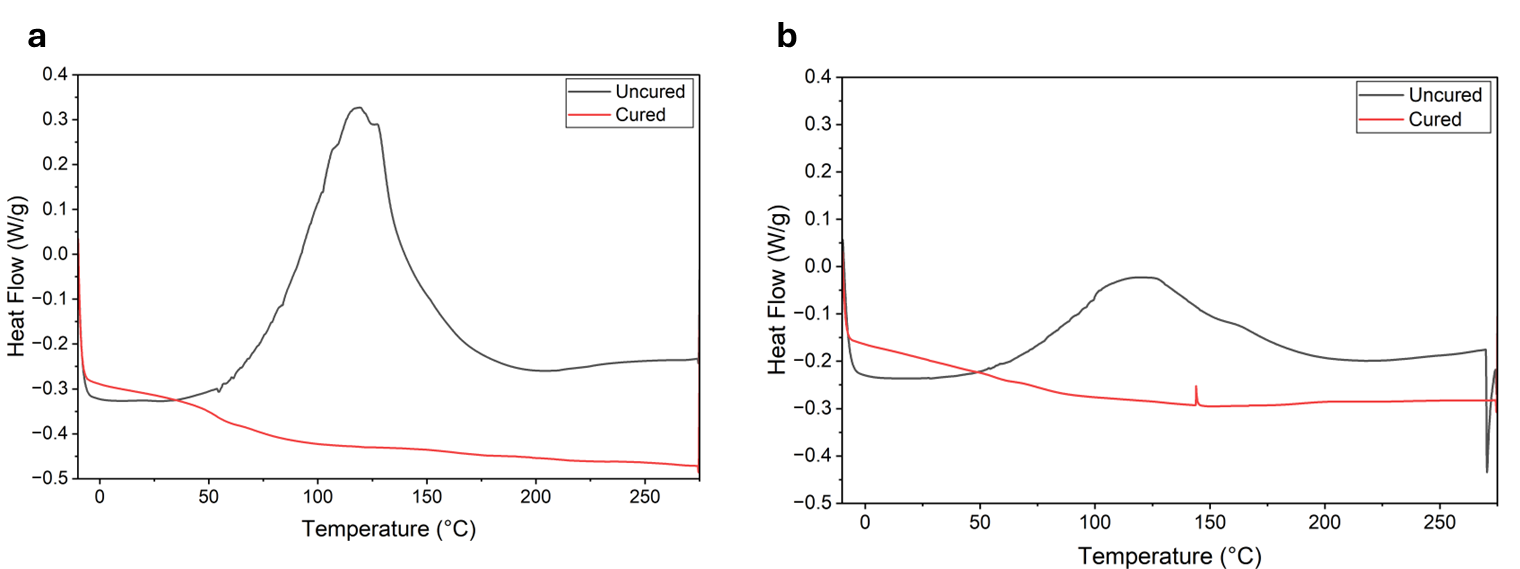 |
| --- |
| **Supplementary Figure 1. DSC results for the hybrid UV resin combinations** **a)** 0. wt% TI and **b)** .25 .wt% TI. |

Data shows that all portions of the standard epoxy infusion resin are fully cured, and the TI has been fully reacted, resulting in no heat release.

| 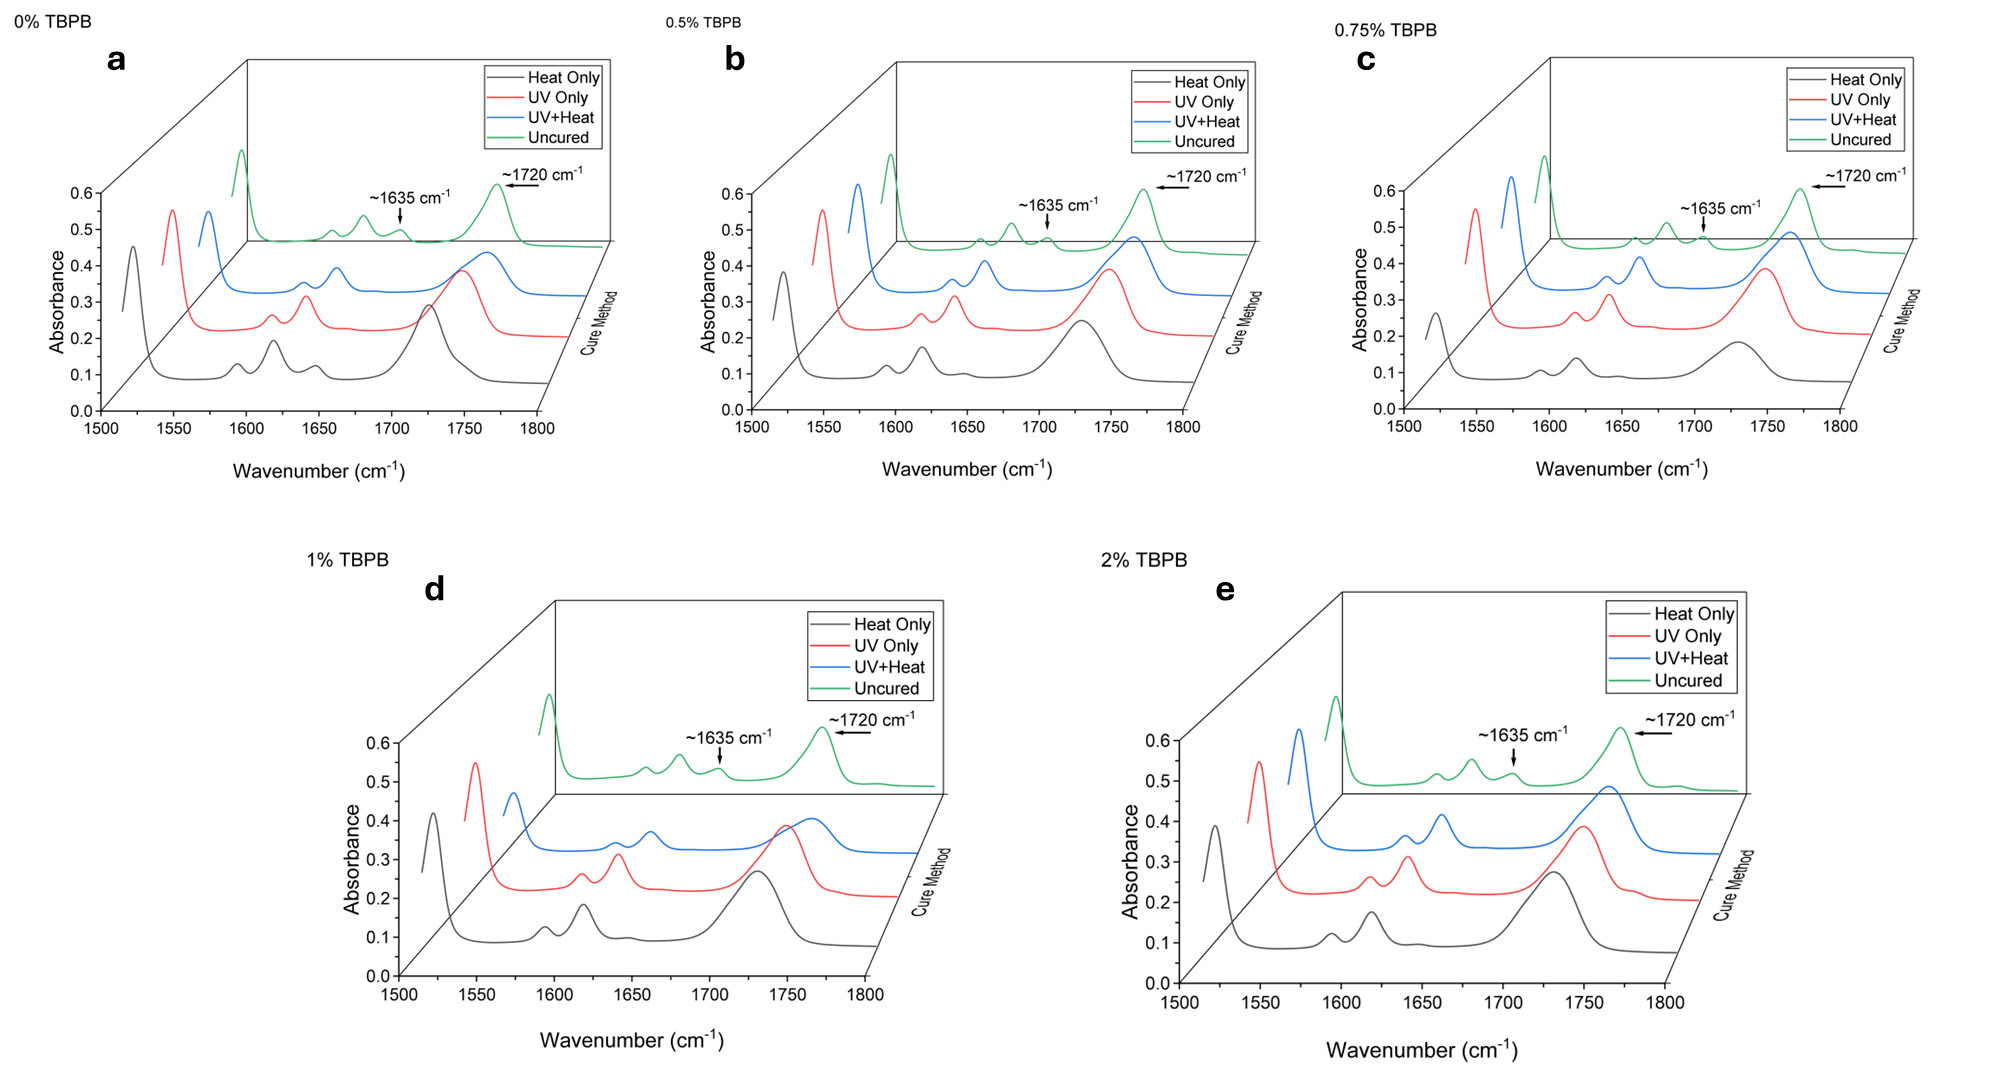 |
| --- |
| **Supplementary Figure 2. FTIR spectra of resin formulations containing different TBPB concentrations under different curing conditions.** Representative absorbance spectra in the 1500–1800 cm⁻¹ region for formulations containing **(a) 0%, (b) 0.5%, (c) 0.75%, (d) 1%, and (e) 2% TBPB**. |

| 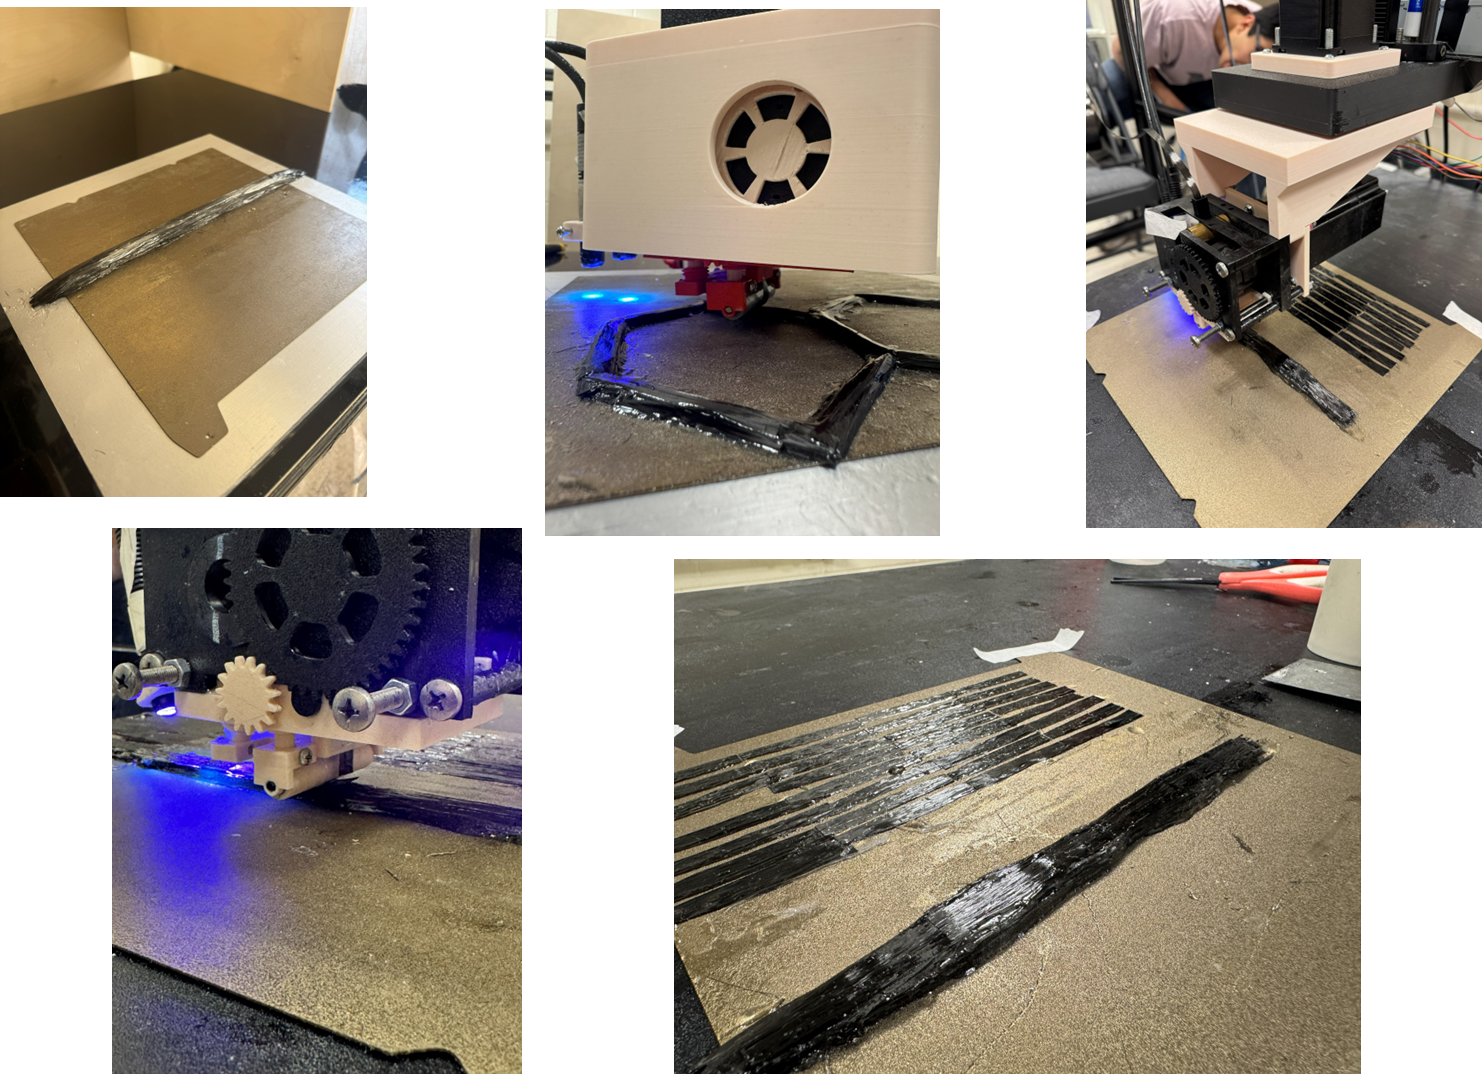 |
| --- |
| **Supplementary Figure 3. Examples of additive manufacturing structures presented in this work.** |
